# Supplementary material
Source: publisher figshare collection journal article supplement (https://acs.figshare.com/ndownloader/files/3947299)
Supplement: Supplementary file 1 [file 3947299]

## Supporting Information

# One of the Distinctive Properties of Ionic Liquids over Molecular Solvents and Inorganic Salts: Enhanced Basicity Stemming from the Electrostatic Environment and “Free” Microstructure

*Qiwei Yang,<sup>a</sup> Huabin Xing,<sup>\*a</sup> Zongbi Bao,<sup>a</sup> Baogen Su,<sup>a</sup> Zhiguo Zhang,<sup>a</sup> Yiwen Yang,<sup>a</sup> Sheng Dai,<sup>b,c</sup> and Qilong Ren<sup>\*a</sup>*

<sup>a</sup>Key Laboratory of Biomass Chemical Engineering of Ministry of Education, Department of Chemical and Biological Engineering, Zhejiang University, Hangzhou 310027, China

<sup>b</sup>Chemical Sciences Division, Oak Ridge National Laboratory, Oak Ridge, TN 37831, United States

<sup>c</sup>Department of Chemistry, University of Tennessee, Knoxville, TN 37966, United States.

\*E-mail: xinghb@zju.edu.cn (H. X.); renql@zju.edu.cn (Q. R.)

## A Ultraviolet absorption spectrum of [Bmim]Cl:Pb<sup>2+</sup>

To obtain the ultraviolet absorption spectrum of [Bmim]Cl:Pb<sup>2+</sup> solution, aliquots of PbCl<sub>2</sub> aqueous solution were added into a small vessel, and then some [Bmim]Cl was added after the fully evaporation of water to achieve a 10 ppm (molar fraction) solution of PbCl<sub>2</sub> in [Bmim]Cl. The obtained mixture was stirred thoroughly at 90 °C, and then was shifted to a quartz cuvette and placed in the sample cell of a Shimadzu UV-2550 UV-visible spectrophotometer. The pure [Bmim]Cl was used as reference, and the absorption spectrum was measured in the range 200-400 nm at room temperature. Scanning was repeated five times for each measurement, and the average of the maximum absorption wavelength of each record was taken as the final value. The uncertainty of the maximum absorption wavelength was ±0.5 nm.

The ultraviolet absorption spectrum of Pb<sup>2+</sup> in [Bmim]Cl at room temperature is shown in Figure S1, where the wavelength of maximum absorbance was 285 nm. This wavelength was larger than that measured in NaCl (273 nm),<sup>1,2</sup> implying a stronger basicity of [Bmim]Cl than NaCl. It should be pointed out that although the peak of absorbance was asymmetric, the wavelengths of the peak area in Figure S1 were generally larger than 273 nm, thus the basicity of [Bmim]Cl can still be considered stronger than that of NaCl.

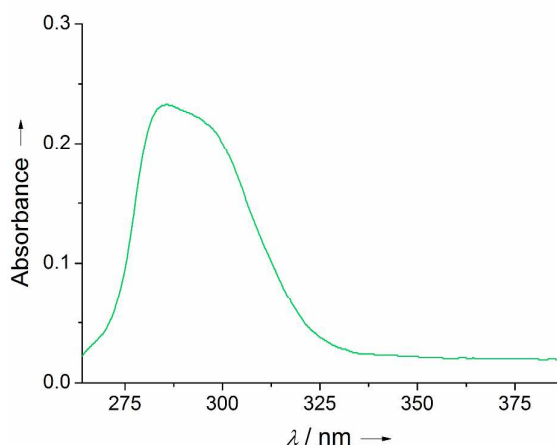

**Figure S1.** Ultraviolet absorption spectrum of Pb<sup>2+</sup> in [Bmim]Cl at room temperature

## B Calculation details of the $V_{s,m}$ and $\bar{I}_{s,m}$ of NaCl and [Bmim]Cl

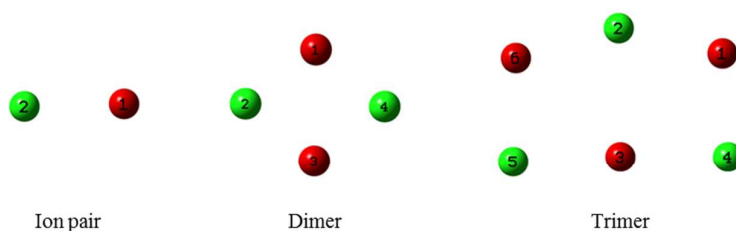

**Figure S2.** Optimized geometries of the ion pair, dimer, and trimer of NaCl at the B3LYP/6-311++G(d,p) level

In the NaCl dimer, the two  $\text{Cl}^-$  are identical, so the  $V_{s,m}$  and  $\bar{I}_{s,m}$  values of the dimer can be taken from any  $\text{Cl}^-$ . As a result, the  $V_{s,m}$  and  $\bar{I}_{s,m}$  are  $-36.1 \text{ kcal mol}^{-1}$  and  $7.68 \text{ eV}$ , respectively, which are shown in Figure 5 of the manuscript. Similarly, in the [Bmim]Cl dimer, the two  $\text{Cl}^-$  are also almost identical, and the values of  $V_{s,m}$  and  $\bar{I}_{s,m}$  are  $-55.9 \text{ kcal mol}^{-1}$  and  $5.95 \text{ eV}$ , respectively.

In the NaCl trimer, there are two types of  $\text{Cl}^-$ : one type is surrounded by two cations ( $\text{Cl}^-$  4 and  $\text{Cl}^-$  5 in Figure S2), and the other type is surrounded by three cations ( $\text{Cl}^-$  2). The latter type of  $\text{Cl}^-$  is the  $\text{Cl}^-$  in which we are interested, as it is typical for a trimer system. Thus the  $V_{s,m}$  and  $\bar{I}_{s,m}$  values of the typical anion  $\text{Cl}^-$  2 were taken for discussing the basicity of the NaCl trimer— $6.5 \text{ kcal mol}^{-1}$  and  $8.36 \text{ eV}$ , respectively, as given in Figure 5. Similarly, in the [Bmim]Cl trimer, the  $V_{s,m}$  and  $\bar{I}_{s,m}$  values of the typical anion ( $\text{Cl}^-$  42 in Figure 4) were taken for discussing the basicity of the [Bmim]Cl trimer,  $-37.5 \text{ kcal mol}^{-1}$  and  $6.17 \text{ eV}$ , respectively as given in Figure 5.

## References

- (1) Collins, W. C.; Crawford, J. H. Polarization of Luminescence in  $\text{NaCl-Pb}^{2+}$  and  $\text{KCl-Pb}^{2+}$ . *Phys. Rev. B* **1972**, *5*, 633-641.
- (2) Dryden, J. S.; Heydon, R. G. Ultraviolet A-Band Absorption in  $\text{NaCl-Pb}^{2+}$  and Clustering of Lattice-Defects. *J. Phys. C: Solid State Phys.* **1983**, *16*, 5363-5373.
